# Supplementary material
Source: PubMed Central journal article supplement (PMC2826220)
Supplement: NIHMS165408-supplement-03.pdf [file NIHMS165408-supplement-03.pdf]

**Supplemental Table 1. Source of the template for dsRNA synthesis**

| <b>Gene</b>    | <b>dsRNA template*<sup>o</sup>†</b> | <b>Length</b> | <b>Region of ORF</b>           |
|----------------|-------------------------------------|---------------|--------------------------------|
| <i>nud-2</i>   | two-hybrid prey                     | 882           | Full length                    |
| <i>bicd-1</i>  | C43G2.2 ORF                         | 1409          | Exons 3-10 of 10               |
| <i>egal-1</i>  | JA:C10G6.1                          | 836           | Exon 2 of 6                    |
| <i>dlc-1</i> ‡ | JA:T26A5.9                          | 976           | Full length                    |
| <i>dhc-1</i> ‡ | JA:T21E12.4                         | 1195          | Exon 10 of 15                  |
| <i>dnc-1</i> ‡ | JA:ZK593.5                          | 1180          | Exons 9-11 of 13               |
| <i>lis-1</i> ‡ | JA:T03F6.5                          | 2257          | Exons 5-9 of 10                |
| C36C9.1        | JA:C36C9.1                          | 1181          | Exons 1-2 of 7                 |
| <i>unc-15</i>  | JA:F07A5.7                          | 1075          | Exons 8-10 of 11               |
| <i>ifd-1</i>   | JA:R04E5.10                         | 1118          | Exons 3-7 of 11                |
| <i>sma-1</i>   | JA:R31.1                            | 2264          | Exons 7-8 of 18 in isoform a   |
| <i>syd-1</i>   | JA:F35D2.5                          | 1189          | Exons 13-15 of 17 in isoform a |
| C27H5.2        | JA: C27H5.2                         | 1083          | Exons 5-10 of 11               |
| F10E9.3        | JA:F10E9.3                          | 822           | Exons 2-3 of 3                 |
| <i>math-41</i> | two-hybrid prey                     | 2115          | Full length                    |
| <i>bath-44</i> | JA:C07D10.2                         | 1196          | Exons 4-9 of 9                 |
| <i>ess-2</i>   | JA:F42H10.7                         | 1161          | Exons 1-4 of 5                 |
| Y38C9A.1       | two-hybrid prey                     | 1292          | Exons 8-10 of 10               |
| Y37A1A.4       | two-hybrid prey                     | 554           | Exons 2-6 of 6 in isoform a    |
| K01A2.10       | two-hybrid prey                     | 774           | Full length                    |
| Y59A8A.3       | two-hybrid prey                     | 883           | Exons 3-7 of 7                 |
| C49H3.6        | two-hybrid prey                     | 1499          | Exons 2-9 of 9 in isoform a    |
| F25F8.1        | JA:F25F8.1                          | 1195          | Exons 3-5 of 11                |
| <i>brp-1</i>   | JA:C51G7.h                          | 950           | Exon 5 of 7                    |
| <i>paqr-1</i>  | JA:C43G2.1                          | 1699          | Exons 2-6 of 7                 |
| C06A5.3        | JA:C06A5.3                          | 1175          | Exons 2-3 of 9                 |
| <i>athp-1</i>  | JA:C44B9.4                          | 1541          | Exon 9-10 of 12                |
| T22D1.3        | JA:T22D1.3                          | 991           | Exon 6-8 of 8                  |

\* Two-hybrid prey vectors pulled out of the screen. These are cDNA fragments.

<sup>o</sup> The C43G2.2 cDNA was obtained from the *C. elegans* ORFeome project (Reboul et al., 2003).

† JA = clone from Ahringer library. These are genomic fragments. See Kamath et al. (2003) and [www.wormbase.org](http://www.wormbase.org) for details.

‡ In these four cases, dsRNA was delivered by feeding. In all other cases, dsRNA was injected.
